# Supplementary material
Source: Springer Nature journal article supplement (https://www.springermedizin.de/resource/supplementary/12889_2013_5339_MOESM1_ESM.pdf/9495142)
Supplement: MOESM1 [file 9495142]

# Social acceptance and use of arsenic mitigation options in Bangladesh

## Pilot interviews November/December 2009 Questionnaire

**For the interviewers:** Please write down **which** households (their **assigned household number**) did **not** want to be interviewed **before** you found this household who takes part in the interview.

.....

**Please interview the person of the household that is responsible for the water for the family!**

### Introduction

**Please introduce yourself!**

Hello, my name is ..... and I am working for Eawag, the Swiss Federal Institute of Aquatic Science and Technology. We are conducting a research study on household water consumption. If you don't mind, I would like to interview you about your water consumption preferences. It will take about 45 minutes. Do you have the time for the interview? We are also interviewing other households in your community as well as other communities in Bangladesh. The results will be treated anonymously. We are not interested in any particular answers, just in the answers that really represent your opinion. We would like to know why people are doing what they are doing so that we can improve the drinking water situation depending on this information. It helps us most if you answer as honest and properly as possible. Please help us in finding out how things really are!

### General information regarding the interview

Start time: .....

B101 ID number: .....

B102 Date of the interview: .....

B103 Number & name of the interviewer: .....

B104 District: <sup>1</sup>  Satkhira    <sup>2</sup>  Munshiganj    <sup>3</sup>  Comilla    <sup>4</sup>  Other:.....

B105 Upazila: <sup>1</sup>  Assassuni    <sup>2</sup>  Sirajdikhan    <sup>3</sup>  Homna    <sup>4</sup>  Other:.....

B106 Union: .....

B107 Ward: .....

B108 Village: .....

### Data of the interviewed person

B114 Name (if they refuse, no problem):.....

B115 Gender: <sup>0</sup>  Male    <sup>1</sup>  Female

B116 Age: .....

B117 Respondent's occupation:

|                                                         |                                                           |
|---------------------------------------------------------|-----------------------------------------------------------|
| <sup>1</sup> <input type="checkbox"/> Unemployed        | <sup>2</sup> <input type="checkbox"/> Housewife           |
| <sup>3</sup> <input type="checkbox"/> Agriculture       | <sup>4</sup> <input type="checkbox"/> Informal employment |
| <sup>5</sup> <input type="checkbox"/> Formal employment | <sup>6</sup> <input type="checkbox"/> Independent work    |
| <sup>7</sup> <input type="checkbox"/> Studies           | <sup>8</sup> <input type="checkbox"/> Retired             |
| <sup>9</sup> <input type="checkbox"/> Other:.....       |                                                           |

- B416 Head of household's occupation:
- 1  Unemployed
  - 2  Housewife
  - 3  Agriculture
  - 4  Informal employment
  - 5  Formal employment
  - 6  Independent work
  - 7  Studies
  - 8  Retired
  - 9  Other:.....

- B118 Are you able to read or write?
- 1  Can neither read nor write
  - 2  Can read only
  - 3  Can write only
  - 4  Can both read and write

B119 Education (years): .....

- B120 Religion:
- 1  Muslim
  - 2  Hindu
  - 3  Buddhist
  - 4  Christian
  - 5  Sonaton
  - 6  Other:.....

## People's problems

B147 What are the **biggest problems** you and your family are facing during everyday life? .....

.....  
 .....

**Interviewer: fill in answers into spaces** Error! Reference source not found. **to** Error! Reference source not found. **(if not already written below).**

Which ones of the following problems are **the three most severe ones** for you? **(Read the whole list!).**

**1 = the most severe, 2 = the 2nd most severe, 3 = the 3rd most severe**

**0 = it is not a problem**

| Problem                                         | Severity rating |
|-------------------------------------------------|-----------------|
| B148 Illness                                    |                 |
| B149 Unemployment                               |                 |
| B150 Windstorms                                 |                 |
| B151 Floods                                     |                 |
| B152 Poverty                                    |                 |
| B153 Price-hikes                                |                 |
| B154 Food Insecurity                            |                 |
| B155 Other ( <b>fill in from above</b> ): ..... | B155r           |
| B156 Other ( <b>fill in from above</b> ):.....  | B156r           |
| B157 Other ( <b>fill in from above</b> ):.....  | B157r           |

B158 What are the **health threats** you and your family are most concerned about?.....  
 .....  
 .....

**Interviewer: fill in answers into spaces** Error! Reference source not found. **to** Error! Reference source not found. (if not already written below).

Which ones of the following health threats are **the three most severe ones** for you? (**Read the whole list!**).

**1 = the most severe, 2 = the 2nd most severe, 3 = the 3rd most severe**

**0 = it is not a problem**

| Health threat                                    | Severity rating |
|--------------------------------------------------|-----------------|
| B159 Fever                                       |                 |
| B160 Diarrhea                                    |                 |
| B161 Arsenicosis                                 |                 |
| B162 Tuberculosis                                |                 |
| B163 Pain                                        |                 |
| B164 Water related illness                       |                 |
| B165 Other ( <b>fill in from above</b> ): :..... | B165r           |
| B166 Other ( <b>fill in from above</b> ): :..... | B166r           |
| B167 Other ( <b>fill in from above</b> ): :..... | B167r           |

B168 What are the **water related problems** you and your family are most concerned about?.....  
 .....  
 .....

**Interviewer: fill in answers into spaces** Error! Reference source not found. **B173 to B175** (if not already written below).

Which ones of the following water related problems are **the three most severe ones** for you? (**Read the whole list!**).

**1 = the most severe, 2 = the 2nd most severe, 3 = the 3rd most severe**

**0 = it is not a problem**

| Water related problem                            | Severity rating |
|--------------------------------------------------|-----------------|
| B169 Bacteria in water                           |                 |
| B170 Not enough water                            |                 |
| B171 Arsenic in water                            |                 |
| B172 Iron in water                               |                 |
| B173 Other ( <b>fill in from above</b> ): :..... | B174r           |
| B174 Other ( <b>fill in from above</b> ): :..... | B175r           |
| B175 Other ( <b>fill in from above</b> ): :..... | B176r           |

## Water consumption history

B109 Do you have a tubewell in your household? 1  yes 0  no

**If no → B417**

B111 Has your tubewell ever been tested for arsenic? 1  yes 0  no

B112 Is your tubewell contaminated with arsenic? 1  yes 0  no

B113 Have you ever increased the depth of your tubewell? 1  yes 0  no

### Water treatment use history from about 5 years ago until today:

**Have you ever used any of the following household water sources directly for drinking or cooking? Are you still using it? Please tell us all the dates when you started and stopped using these water sources and please name the reasons for starting and stopping.**

|      | Water source type available or not?                                                                                                                                                                   | Date start (MM/YY) <sub>a</sub> | Date stop (MM/YY) <sub>b</sub> | What was the reason why you started (e.g. promotion event etc.)? <sub>c</sub> | Why did you stop? Please try to remember the exact cause! <sub>d</sub> |
|------|-------------------------------------------------------------------------------------------------------------------------------------------------------------------------------------------------------|---------------------------------|--------------------------------|-------------------------------------------------------------------------------|------------------------------------------------------------------------|
| B417 | Own untested tubewell (directly) <span style="margin-left: 20px;">1 <input type="checkbox"/> yes</span><br><span style="margin-left: 20px;">0 <input type="checkbox"/> no</span>                      |                                 |                                |                                                                               |                                                                        |
| B418 | Own <b>un</b> contaminated tubewell (directly) <span style="margin-left: 20px;">1 <input type="checkbox"/> yes</span><br><span style="margin-left: 20px;">0 <input type="checkbox"/> no</span>        |                                 |                                |                                                                               |                                                                        |
| B419 | Own contaminated tubewell (directly) <span style="margin-left: 20px;">1 <input type="checkbox"/> yes</span><br><span style="margin-left: 20px;">0 <input type="checkbox"/> no</span>                  |                                 |                                |                                                                               |                                                                        |
| B420 | Own <b>re-sunk</b> tubewell (directly) <span style="margin-left: 20px;">1 <input type="checkbox"/> yes</span><br><span style="margin-left: 20px;">0 <input type="checkbox"/> no</span>                |                                 |                                |                                                                               |                                                                        |
| B421 | Neighbor's untested tubewell (directly) <span style="margin-left: 20px;">1 <input type="checkbox"/> yes</span><br><span style="margin-left: 20px;">0 <input type="checkbox"/> no</span>               |                                 |                                |                                                                               |                                                                        |
| B422 | Neighbor's <b>un</b> contaminated tubewell (directly) <span style="margin-left: 20px;">1 <input type="checkbox"/> yes</span><br><span style="margin-left: 20px;">0 <input type="checkbox"/> no</span> |                                 |                                |                                                                               |                                                                        |
| B423 | Neighbor's contaminated tubewell (directly) <span style="margin-left: 20px;">1 <input type="checkbox"/> yes</span><br><span style="margin-left: 20px;">0 <input type="checkbox"/> no</span>           |                                 |                                |                                                                               |                                                                        |
| B424 | Household filter (Sono, Alcan, Read-F) <span style="margin-left: 20px;">1 <input type="checkbox"/> yes</span>                                                                                         |                                 |                                |                                                                               |                                                                        |

|      |                                       |                                                                 |  |  |  |  |
|------|---------------------------------------|-----------------------------------------------------------------|--|--|--|--|
| B425 | Household rainwater harvesting system | 1 <input type="checkbox"/> yes<br>0 <input type="checkbox"/> no |  |  |  |  |
| B426 | Pond/river/canal                      | 1 <input type="checkbox"/> yes<br>0 <input type="checkbox"/> no |  |  |  |  |
| B427 | Bottled water                         | 1 <input type="checkbox"/> yes<br>0 <input type="checkbox"/> no |  |  |  |  |

***If the respondent never used tubewell water for drinking or for cooking: thank respondent, ask if she or he has any questions, answer them and end interview.***

**Are there any of the following community water sources in your village? Are you using it or have you used it in the past for drinking or cooking? Please tell us all the dates when you started and stopped using these water sources and please name the reasons for starting and stopping.**

|      | Water treatment type                   | Available or not ?                                              | Date start (MM/YY) <sub>a</sub> | Date stop (MM/YY) <sub>b</sub> | What was the reason you started (e.g. promotion event etc.)? <sub>c</sub> | Why did you stop? Please try to remember the exact cause! <sub>d</sub> |
|------|----------------------------------------|-----------------------------------------------------------------|---------------------------------|--------------------------------|---------------------------------------------------------------------------|------------------------------------------------------------------------|
| B428 | Sidko plant                            | 1 <input type="checkbox"/> yes<br>0 <input type="checkbox"/> no |                                 |                                |                                                                           |                                                                        |
| B429 | Pond sandfilter                        | 1 <input type="checkbox"/> yes<br>0 <input type="checkbox"/> no |                                 |                                |                                                                           |                                                                        |
| B430 | Piped water supply system              | 1 <input type="checkbox"/> yes<br>0 <input type="checkbox"/> no |                                 |                                |                                                                           |                                                                        |
| B431 | Dugwell                                | 1 <input type="checkbox"/> yes<br>0 <input type="checkbox"/> no |                                 |                                |                                                                           |                                                                        |
| B432 | Deep tubewell                          | 1 <input type="checkbox"/> yes<br>0 <input type="checkbox"/> no |                                 |                                |                                                                           |                                                                        |
| B433 | Community rain-water harvesting system | 1 <input type="checkbox"/> yes<br>0 <input type="checkbox"/> no |                                 |                                |                                                                           |                                                                        |

## Current water consumption of the family

**Interviewer:** Ask the respondent to show you, which vessel he or she uses for drinking.

B177 Estimated contents of the vessel used for **drinking** (interviewer estimate): ..... liters.

**Interviewer:** Ask the respondent to show you, which vessel he or she uses for pouring water for cooking.

B178 Estimated contents of the vessel used for **pouring water for cooking** (interviewer estimate): ..... liters.

| Please <u>only</u> fill in the <u>first column</u> of the tables (number of vessels). | B179<br>How many vessels of the following water sources do you and others living in your household <b>drink</b> per day? |             |          | B180<br>How many vessels of the following water sources do you and others living in your household <b>use for cooking</b> per day? |             |          |
|---------------------------------------------------------------------------------------|--------------------------------------------------------------------------------------------------------------------------|-------------|----------|------------------------------------------------------------------------------------------------------------------------------------|-------------|----------|
|                                                                                       | Vessels<br>1                                                                                                             | Liters<br>2 | (%)<br>3 | Vessels<br>1                                                                                                                       | Liters<br>2 | (%)<br>3 |
| <b>a Total:</b>                                                                       |                                                                                                                          |             | 100      |                                                                                                                                    |             | 100      |
| <i>b</i> Water from household As filter                                               |                                                                                                                          |             |          |                                                                                                                                    |             |          |
| <i>c</i> Water from community As filter (Sidko)                                       |                                                                                                                          |             |          |                                                                                                                                    |             |          |
| <i>d</i> Tubewell water from neighbor (green/uncontaminated)                          |                                                                                                                          |             |          |                                                                                                                                    |             |          |
| <i>e</i> Water from untested tubewell                                                 |                                                                                                                          |             |          |                                                                                                                                    |             |          |
| <i>f</i> Bottled water                                                                |                                                                                                                          |             |          |                                                                                                                                    |             |          |
| <i>g</i> Sand filtered pond water                                                     |                                                                                                                          |             |          |                                                                                                                                    |             |          |
| <i>h</i> Rain water (from their own rainwater harvesting system)                      |                                                                                                                          |             |          |                                                                                                                                    |             |          |
| <i>i</i> Deep tubewell water                                                          |                                                                                                                          |             |          |                                                                                                                                    |             |          |
| <i>j</i> Dugwell water                                                                |                                                                                                                          |             |          |                                                                                                                                    |             |          |
| Please <u>only</u> fill in the <u>first column</u> of the tables (number of vessels). | B181<br>How many vessels of the following water sources do you and others living in your household <b>drink</b> per day? |             |          | B182<br>How many vessels of the following water sources do you and others living in your household <b>use for cooking</b> per day? |             |          |
|                                                                                       | Vessels<br>1                                                                                                             | Liters<br>2 | (%)<br>3 | Vessels<br>1                                                                                                                       | Liters<br>2 | (%)<br>3 |
| <i>k</i> Water from piped water supply system                                         |                                                                                                                          |             |          |                                                                                                                                    |             |          |
| <i>l</i> Water from re-sunk, private tubewell                                         |                                                                                                                          |             |          |                                                                                                                                    |             |          |
| <i>m</i> Water from pond/river (unfiltered)                                           |                                                                                                                          |             |          |                                                                                                                                    |             |          |
| <i>n</i> Tubewell water (red/contaminated)                                            |                                                                                                                          |             |          |                                                                                                                                    |             |          |
| <i>o</i> Rain water (from community rainwater harvesting system)                      |                                                                                                                          |             |          |                                                                                                                                    |             |          |
| <i>p</i> Other:.....                                                                  |                                                                                                                          |             |          |                                                                                                                                    |             |          |

**For USERS of arsenic mitigation options (= presently taking water from an arsenic mitigation option):**

- For people who use one option: Please select the appropriate sheets for the option they are using.
- For people who use several options: Please select the appropriate sheets for the option the respondent is mainly using for drinking and cooking and attach them to the questionnaire.
- **EXCEPTION:** people who use an arsenic mitigation option that is not listed here (p = other): thank respondent, ask if she/he has any questions, answer them and end the interview.

**For NON-USERS of arsenic mitigation options (= people who are presently NOT taking water from an arsenic mitigation option):**

- **If they previously used an option:** Please select the appropriate sheets for the option they previously used!
- **If they have never used an option:** Please ask them, which option they are most likely to use of the options that are available to them (information from B417-B433)!

**For DEEP TUBEWELL USERS that use only deep tubewells for drinking and cooking:**

- **If they previously used any other option (information from B417-B433):** Please select the appropriate sheets for the option they previously used!
- **If they have never used any other option (information from B417-B433):** Thank the respondent, ask if he or she has any questions, answer them and end the interview!

## Household Filter Questionnaire (Sono/ Alcan/ Read-F)

### Advantages and disadvantages of drinking water from red tubewell / untested well

- a. What are the advantages and disadvantages of drinking water from red tubewell / untested well?  
 r. Which of them are the three most important advantages / disadvantages? 1 = most important, 2 = 2nd most important, 3 = 3rd most important

| Drinking water from red tubewell / untested well |                            |
|--------------------------------------------------|----------------------------|
| <b>Advantages</b>                                | <b>Ranking</b><br><i>r</i> |
| B192                                             |                            |
| B193                                             |                            |
| B194                                             |                            |
| B195                                             |                            |
| B196                                             |                            |
| <b>Disadvantages</b>                             | <b>Ranking</b><br><i>r</i> |
| B197                                             |                            |
| B198                                             |                            |
| B199                                             |                            |
| B200                                             |                            |
| B201                                             |                            |

### Water from red tubewell / untested tubewell

***If family drinks water or cooks with water from an untested tubewell:***

B204 Why haven't you tested your tubewell for arsenic?

.....  
 .....

B207 How much did you pay for installation of the red tubewell / untested tubewell?

.....Tk      <sup>9</sup>  I don't know      <sup>888</sup>  Doesn't own a tubewell.

B208 How much do you pay for maintenance of the red tubewell / untested tubewell per year? .....Tk

**B209** How much do you like or dislike **drinking** water from the red tubewell / untested tubewell?

| Rather dislike it           |                             |                             | Rather neutral              |                                       |                            | Rather like it             |                            |                            |
|-----------------------------|-----------------------------|-----------------------------|-----------------------------|---------------------------------------|----------------------------|----------------------------|----------------------------|----------------------------|
| -4 <input type="checkbox"/> | -3 <input type="checkbox"/> | -2 <input type="checkbox"/> | -1 <input type="checkbox"/> | 0 <input type="checkbox"/>            | 1 <input type="checkbox"/> | 2 <input type="checkbox"/> | 3 <input type="checkbox"/> | 4 <input type="checkbox"/> |
| I dislike it very much      | I dislike it                | I quite dislike it          | I rather dislike it         | I neither dislike it nor do I like it | I rather like it           | I quite like it            | I like it                  | I like it very much        |

**B210** How much do you like or dislike the **taste** of water from the red tubewell / untested tubewell?

| Rather dislike it           |                             |                             | Rather neutral              |                                       |                            | Rather like it             |                            |                            |
|-----------------------------|-----------------------------|-----------------------------|-----------------------------|---------------------------------------|----------------------------|----------------------------|----------------------------|----------------------------|
| -4 <input type="checkbox"/> | -3 <input type="checkbox"/> | -2 <input type="checkbox"/> | -1 <input type="checkbox"/> | 0 <input type="checkbox"/>            | 1 <input type="checkbox"/> | 2 <input type="checkbox"/> | 3 <input type="checkbox"/> | 4 <input type="checkbox"/> |
| I dislike it very much      | I dislike it                | I quite dislike it          | I rather dislike it         | I neither dislike it nor do I like it | I rather like it           | I quite like it            | I like it                  | I like it very much        |

**B211** How much do you like or dislike the **smell** of water from the red tubewell / untested tubewell?

| Rather dislike it           |                             |                             | Rather neutral              |                                       |                            | Rather like it             |                            |                            |
|-----------------------------|-----------------------------|-----------------------------|-----------------------------|---------------------------------------|----------------------------|----------------------------|----------------------------|----------------------------|
| -4 <input type="checkbox"/> | -3 <input type="checkbox"/> | -2 <input type="checkbox"/> | -1 <input type="checkbox"/> | 0 <input type="checkbox"/>            | 1 <input type="checkbox"/> | 2 <input type="checkbox"/> | 3 <input type="checkbox"/> | 4 <input type="checkbox"/> |
| I dislike it very much      | I dislike it                | I quite dislike it          | I rather dislike it         | I neither dislike it nor do I like it | I rather like it           | I quite like it            | I like it                  | I like it very much        |

**B212** How much do you like or dislike the **temperature** of water from the red tubewell / untested well?

| Rather dislike it           |                             |                             | Rather neutral              |                                       |                            | Rather like it             |                            |                            |
|-----------------------------|-----------------------------|-----------------------------|-----------------------------|---------------------------------------|----------------------------|----------------------------|----------------------------|----------------------------|
| -4 <input type="checkbox"/> | -3 <input type="checkbox"/> | -2 <input type="checkbox"/> | -1 <input type="checkbox"/> | 0 <input type="checkbox"/>            | 1 <input type="checkbox"/> | 2 <input type="checkbox"/> | 3 <input type="checkbox"/> | 4 <input type="checkbox"/> |
| I completely dislike it     | I dislike it                | I quite dislike it          | I rather dislike it         | I neither dislike it nor do I like it | I rather like it           | I quite like it            | I like it                  | I like it very much        |

**B213** How much do you like or dislike the **color** of water from the red tubewell / untested tubewell?

| Rather dislike it           |                             |                             | Rather neutral              |                                       |                            | Rather like it             |                            |                            |
|-----------------------------|-----------------------------|-----------------------------|-----------------------------|---------------------------------------|----------------------------|----------------------------|----------------------------|----------------------------|
| -4 <input type="checkbox"/> | -3 <input type="checkbox"/> | -2 <input type="checkbox"/> | -1 <input type="checkbox"/> | 0 <input type="checkbox"/>            | 1 <input type="checkbox"/> | 2 <input type="checkbox"/> | 3 <input type="checkbox"/> | 4 <input type="checkbox"/> |
| I dislike it very much      | I dislike it                | I quite dislike it          | I rather dislike it         | I neither dislike it nor do I like it | I rather like it           | I quite like it            | I like it                  | I like it very much        |

**B214** How high or low are the chances that you develop an illness when drinking water from a red tubewell / an untested tubewell?

| Rather low                  |                             |                             | Rather average              |                            |                            | Rather high                |                            |                            |
|-----------------------------|-----------------------------|-----------------------------|-----------------------------|----------------------------|----------------------------|----------------------------|----------------------------|----------------------------|
| -4 <input type="checkbox"/> | -3 <input type="checkbox"/> | -2 <input type="checkbox"/> | -1 <input type="checkbox"/> | 0 <input type="checkbox"/> | 1 <input type="checkbox"/> | 2 <input type="checkbox"/> | 3 <input type="checkbox"/> | 4 <input type="checkbox"/> |
| Very low                    | Low                         | Quite low                   | Rather low                  | Average                    | Rather high                | Quite high                 | High                       | Very high                  |

**B215** Why do you think that you are likely / unlikely (**select according to previous answer!**) to develop an illness when drinking water from the red tubewell / untested tubewell?

.....

.....

**B217** How many people of your atio shojun (= relatives), excluding people of your own household, drink water from a red tubewell / untested tubewell?

|                            |                            |                            |                            |                             |
|----------------------------|----------------------------|----------------------------|----------------------------|-----------------------------|
| 0 <input type="checkbox"/> | 1 <input type="checkbox"/> | 2 <input type="checkbox"/> | 3 <input type="checkbox"/> | 4 <input type="checkbox"/>  |
| (Almost) nobody (0%)       | Some of them (25%)         | Half of them (50%)         | Most of them (75%)         | (Almost) all of them (100%) |

**B218** How many people **outside your family** drink water from a red tubewell / untested tubewell?

|                            |                            |                            |                            |                             |
|----------------------------|----------------------------|----------------------------|----------------------------|-----------------------------|
| 0 <input type="checkbox"/> | 1 <input type="checkbox"/> | 2 <input type="checkbox"/> | 3 <input type="checkbox"/> | 4 <input type="checkbox"/>  |
| (Almost) nobody (0%)       | Some of them (25%)         | Half of them (50%)         | Most of them (75%)         | (Almost) all of them (100%) |

**B219** Let's suppose you drink water from an untested/ red tubewell. Would people who are important to you rather approve or disapprove of this?

| Rather disapprove           |                             |                               | Rather neutral              |                                        |                            | Rather approve             |                            |                            |
|-----------------------------|-----------------------------|-------------------------------|-----------------------------|----------------------------------------|----------------------------|----------------------------|----------------------------|----------------------------|
| -4 <input type="checkbox"/> | -3 <input type="checkbox"/> | -2 <input type="checkbox"/>   | -1 <input type="checkbox"/> | 0 <input type="checkbox"/>             | 1 <input type="checkbox"/> | 2 <input type="checkbox"/> | 3 <input type="checkbox"/> | 4 <input type="checkbox"/> |
| Nearly all disapprove       | Most disapprove             | Significantly more disapprove | Rather more disapprove      | The same amount disapprove and approve | Rather more approve        | Significantly more approve | Most approve               | Nearly all approve         |

**B221** How good or bad would you say is it to drink water from a red tubewell / untested tubewell?

| Rather bad                  |                             |                             | Rather neutral              |                            |                            | Rather good                |                            |                            |
|-----------------------------|-----------------------------|-----------------------------|-----------------------------|----------------------------|----------------------------|----------------------------|----------------------------|----------------------------|
| -4 <input type="checkbox"/> | -3 <input type="checkbox"/> | -2 <input type="checkbox"/> | -1 <input type="checkbox"/> | 0 <input type="checkbox"/> | 1 <input type="checkbox"/> | 2 <input type="checkbox"/> | 3 <input type="checkbox"/> | 4 <input type="checkbox"/> |
| Very bad                    | Bad                         | Quite bad                   | A little bit bad            | Neither good nor bad       | A little good              | Quite good                 | Good                       | Very good                  |

**B222** How difficult or easy is it to resist drinking water from the red tubewell / untested tubewell?

| Rather difficult            |                             |                             | Rather neutral              |                            |                            | Rather easy                |                            |                            |
|-----------------------------|-----------------------------|-----------------------------|-----------------------------|----------------------------|----------------------------|----------------------------|----------------------------|----------------------------|
| -4 <input type="checkbox"/> | -3 <input type="checkbox"/> | -2 <input type="checkbox"/> | -1 <input type="checkbox"/> | 0 <input type="checkbox"/> | 1 <input type="checkbox"/> | 2 <input type="checkbox"/> | 3 <input type="checkbox"/> | 4 <input type="checkbox"/> |
| Very difficult              | Difficult                   | Quite difficult             | Rather difficult            | Neither easy nor difficult | Rather easy                | Quite easy                 | Easy                       | Very easy                  |

**B223** I am confident that I can resist drinking water from the red tubewell / untested tubewell from now on.

| Rather disagree             |                             |                             | Rather neutral              |                              |                            | Rather agree               |                            |                            |
|-----------------------------|-----------------------------|-----------------------------|-----------------------------|------------------------------|----------------------------|----------------------------|----------------------------|----------------------------|
| -4 <input type="checkbox"/> | -3 <input type="checkbox"/> | -2 <input type="checkbox"/> | -1 <input type="checkbox"/> | 0 <input type="checkbox"/>   | 1 <input type="checkbox"/> | 2 <input type="checkbox"/> | 3 <input type="checkbox"/> | 4 <input type="checkbox"/> |
| I strongly disagree         | I disagree                  | I quite disagree            | I rather disagree           | I neither agree nor disagree | I rather agree             | I quite agree              | I agree                    | I strongly agree           |

**B224** How strongly do you intend to always drink water from the red tubewell / untested tubewell?

0  Not at all      1  Not      2  A little      3  Strongly      4  Very strongly

**B225** How strongly do you intend to always cook with water from the red tubewell / untested tubewell?

0  Not at all      1  Not      2  A little      3  Strongly      4  Very strongly

**B226** Do you think there is something harmful in the water from red tubewells / untested tubewells?

1  yes      0  no      9 I don't know

**B227** Do you think there is something harmful in the food you cooked with water from red tubewells / untested tubewells?  
1  yes      0  no      9 I don't know

|               |                                                                                                                                                                           |                                                                                                                                                                                        |
|---------------|---------------------------------------------------------------------------------------------------------------------------------------------------------------------------|----------------------------------------------------------------------------------------------------------------------------------------------------------------------------------------|
|               | <b>B226</b><br>Which of these substances does the <b>water from your red tubewell / untested tubewell</b> contain (or the one you use, in case you don't own a tubewell): | <b>B227</b><br>Which of these substances does <b>food cooked with water</b> from your red tubewell / untested tubewell (or the one you use, in case you don't own a tubewell) contain: |
| a Arsenic     | 1 <input type="checkbox"/> yes      0 <input type="checkbox"/> no      888 <input type="checkbox"/> I don't know                                                          | 1 <input type="checkbox"/> yes      0 <input type="checkbox"/> no      888 <input type="checkbox"/> I don't know                                                                       |
| b Iron        | 1 <input type="checkbox"/> yes      0 <input type="checkbox"/> no      888 <input type="checkbox"/> I don't know                                                          | 1 <input type="checkbox"/> yes      0 <input type="checkbox"/> no      888 <input type="checkbox"/> I don't know                                                                       |
| o Other:..... | 1 <input type="checkbox"/> yes      0 <input type="checkbox"/> no      888 <input type="checkbox"/> I don't know                                                          | 1 <input type="checkbox"/> yes      0 <input type="checkbox"/> no      888 <input type="checkbox"/> I don't know                                                                       |
|               | <b>B228</b><br>Do you think <b>the filter</b> you got is capable to clean the water from:                                                                                 |                                                                                                                                                                                        |
| a Arsenic     | 1 <input type="checkbox"/> yes      0 <input type="checkbox"/> no      888 <input type="checkbox"/> I don't know                                                          |                                                                                                                                                                                        |
| b Iron        | 1 <input type="checkbox"/> yes      0 <input type="checkbox"/> no      888 <input type="checkbox"/> I don't know                                                          |                                                                                                                                                                                        |
| o Other:..... | 1 <input type="checkbox"/> yes      0 <input type="checkbox"/> no      888 <input type="checkbox"/> I don't know                                                          |                                                                                                                                                                                        |

B216 What do you think of people who have a filter but drink water directly from a red tubewell or untested well without filtering it?

| Rather badly                |                             |                             | Rather neutral               |                                        |                             | Rather well                |                            |                            |
|-----------------------------|-----------------------------|-----------------------------|------------------------------|----------------------------------------|-----------------------------|----------------------------|----------------------------|----------------------------|
| -4 <input type="checkbox"/> | -3 <input type="checkbox"/> | -2 <input type="checkbox"/> | -1 <input type="checkbox"/>  | 0 <input type="checkbox"/>             | 1 <input type="checkbox"/>  | 2 <input type="checkbox"/> | 3 <input type="checkbox"/> | 4 <input type="checkbox"/> |
| I think very badly of them  | I think badly of them       | I think quite badly of them | I think rather badly of them | I think neither badly nor well of them | I think rather well of them | I think quite well of them | I think well of them       | I think very well of them  |

**Advantages and disadvantages of using the filter and drinking filtered water**

- a. What are the advantages and disadvantages of drinking filtered water ?
- r. Which of them are the three most important advantages / disadvantages? 1 = most important, 2 = 2nd most important, 3 = 3rd most important

| Using the filter and drinking filtered water |              |
|----------------------------------------------|--------------|
| Advantages                                   | Ranking<br>r |
| B229                                         |              |
| B230                                         |              |
| B231                                         |              |
| B232                                         |              |
| B233                                         |              |
| Disadvantages                                | Ranking<br>r |
| B234                                         |              |
| B235                                         |              |
| B236                                         |              |
| B237                                         |              |
| B238                                         |              |

**Filter knowledge**

- B239 How much does the filter cost? ..... Tk.
- B240 Does the filter media need changing from time to time? <sup>1</sup>  yes <sup>0</sup>  no <sup>9</sup>  I don't know
- B241 **If yes:** How often?  

|       |        |                 |         |                  |            |                   |              |
|-------|--------|-----------------|---------|------------------|------------|-------------------|--------------|
| 0     | 1      | 2               | 3       | 4                | 5          | 6                 | 9            |
| Daily | Weekly | Every two weeks | Monthly | Every six months | Every year | Once in two years | I don't know |
- B245 **If yes:** How much does the refill media cost? ..... Tk. <sup>888</sup>  I don't know
- B242 Does the filter media need washing from time to time? <sup>1</sup>  yes <sup>0</sup>  no <sup>9</sup>  I don't know

B243 **If yes:** How often?

- 0                      1                      2                      3                      4                      5                      6                      9
- Daily              Weekly              Every two weeks              Monthly              Every six months              Every year              Once in two years              I don't know

B244 How do you know, when the filter media needs washing?

.....

.....

B247 What (would you) do you do / whom do you contact when (if) you experience problems regarding filter repairs?

.....

.....

**Filter use**

B248 Which filter do you use?

- <sup>1</sup>  Sono              <sup>2</sup>  Alcan              <sup>3</sup>  Read-F

B249 Where did you get your filter from?

- <sup>1</sup>  MSUK (Sono manufacturer)              <sup>2</sup>  NGO              <sup>3</sup>  DPHE              <sup>4</sup>  UNICEF

B250 Estimated contents of the vessel/jug used for **filling the filter** (interviewer estimate): ..... liters.

|                                                                             | Vessel/<br>Jugs<br><i>a</i> | Liters<br><i>b</i> | (%)<br><i>c</i> |
|-----------------------------------------------------------------------------|-----------------------------|--------------------|-----------------|
| B255 How many vessel do you fill into the filter for .....? (other purpose) |                             |                    |                 |

B256 How much did you pay for the filter? \_\_\_\_\_Tk.

B258 How many times a day do you fill the filter with water? \_\_\_\_\_times

B264 Who of your household makes the decision if the water is filtered or not?

- B264a Respondent    <sup>1</sup>  yes    <sup>0</sup> no
- B264b Husband        <sup>1</sup>  yes    <sup>0</sup> no
- B264c Wife              <sup>1</sup>  yes    <sup>0</sup> no
- B264d Daughter        <sup>1</sup>  yes    <sup>0</sup> no
- B264e Son                <sup>1</sup>  yes    <sup>0</sup> no
- B264f Brother            <sup>1</sup>  yes    <sup>0</sup> no
- B264g Sister            <sup>1</sup>  yes    <sup>0</sup> no
- B264h Father            <sup>1</sup>  yes    <sup>0</sup> no
- B264i Mother            <sup>1</sup>  yes    <sup>0</sup> no
- B264o Other: .....

B271 How strongly do you intend to always cook with filtered water?

- <sup>0</sup>  Not at all    <sup>1</sup>  Not              <sup>2</sup>  A little        <sup>3</sup>  Strongly        <sup>4</sup>  Very strongly

B272 I want to cook with filtered water regularly from now on.

| Rather disagree                        |                                        |                                        | Rather neutral                         |                                       |                                       | Rather agree                          |                                       |                                       |
|----------------------------------------|----------------------------------------|----------------------------------------|----------------------------------------|---------------------------------------|---------------------------------------|---------------------------------------|---------------------------------------|---------------------------------------|
| <sup>-4</sup> <input type="checkbox"/> | <sup>-3</sup> <input type="checkbox"/> | <sup>-2</sup> <input type="checkbox"/> | <sup>-1</sup> <input type="checkbox"/> | <sup>0</sup> <input type="checkbox"/> | <sup>1</sup> <input type="checkbox"/> | <sup>2</sup> <input type="checkbox"/> | <sup>3</sup> <input type="checkbox"/> | <sup>4</sup> <input type="checkbox"/> |
| I strongly disagree                    | I disagree                             | I quite disagree                       | I rather disagree                      | I neither agree nor disagree          | I rather agree                        | I quite agree                         | I agree                               | I strongly agree                      |

**B273** How often do you need more water for drinking and cooking than is available from the filter?

- <sup>0</sup>  (Almost) always    <sup>1</sup>  Often    <sup>2</sup>  Sometimes    <sup>3</sup>  (Almost) never

**B274** Are there any seasonal peculiarities in using the filter?

.....  
 .....

**B275** Filling the filter with water is something I do as a matter of habit.

| Rather disagree                        |                                        |                                        | Rather neutral                         |                                       |                                       | Rather agree                          |                                       |                                       |
|----------------------------------------|----------------------------------------|----------------------------------------|----------------------------------------|---------------------------------------|---------------------------------------|---------------------------------------|---------------------------------------|---------------------------------------|
| <sup>-4</sup> <input type="checkbox"/> | <sup>-3</sup> <input type="checkbox"/> | <sup>-2</sup> <input type="checkbox"/> | <sup>-1</sup> <input type="checkbox"/> | <sup>0</sup> <input type="checkbox"/> | <sup>1</sup> <input type="checkbox"/> | <sup>2</sup> <input type="checkbox"/> | <sup>3</sup> <input type="checkbox"/> | <sup>4</sup> <input type="checkbox"/> |
| I strongly disagree                    | I disagree                             | I quite disagree                       | I rather disagree                      | I neither agree nor disagree          | I rather agree                        | I quite agree                         | I agree                               | I strongly agree                      |

**B276** Do you fill the filter automatically?

| <sup>0</sup> <input type="checkbox"/> | <sup>1</sup> <input type="checkbox"/> | <sup>2</sup> <input type="checkbox"/> | <sup>3</sup> <input type="checkbox"/> | <sup>4</sup> <input type="checkbox"/> |
|---------------------------------------|---------------------------------------|---------------------------------------|---------------------------------------|---------------------------------------|
| Not at all automatically              | Not automatically                     | Quite automatically                   | Automatically                         | Very automatically                    |

**B277** When do you normally fill the filter with water (e.g. after getting up, after cleaning etc.)?

.....  
 .....

**B278** How often do you fill the filter at these moments?

- <sup>0</sup>  (Almost) never    <sup>1</sup>  Often    <sup>2</sup>  Sometimes    <sup>3</sup>  (Almost) always

**B279** How much do other habits hinder you to fill your filter with water?

- <sup>0</sup>  Not at all    <sup>1</sup>  A little    <sup>2</sup>  Medium    <sup>3</sup>  Much    <sup>4</sup>  Very much

**B280** How difficult is it to remember filling the filter with water?

- <sup>0</sup>  Very difficult    <sup>1</sup>  Difficult    <sup>2</sup>  Medium    <sup>3</sup>  Not so difficult    <sup>4</sup>  Not difficult at all

**B281** How often does it happen that you forget to fill the filter with water?

- <sup>0</sup>  (Almost) always    <sup>1</sup>  Often    <sup>2</sup>  Sometimes    <sup>3</sup>  (Almost) never

**B282** How often did you forget to fill the filter with water in the last two weeks? \_\_\_\_\_ times

**B283** Is there something which helps you remind to fill the filter?    <sup>1</sup>  yes    <sup>0</sup>  no

**B284** **If yes:** what or who reminds you to fill the filter?

\_\_\_\_\_

**B285** How important is it for you to fill the filter regularly?

| Rather unimportant                     |                                        |                                        | Rather neutral                         |                                       |                                       | Rather important                      |                                       |                                       |
|----------------------------------------|----------------------------------------|----------------------------------------|----------------------------------------|---------------------------------------|---------------------------------------|---------------------------------------|---------------------------------------|---------------------------------------|
| <sup>-4</sup> <input type="checkbox"/> | <sup>-3</sup> <input type="checkbox"/> | <sup>-2</sup> <input type="checkbox"/> | <sup>-1</sup> <input type="checkbox"/> | <sup>0</sup> <input type="checkbox"/> | <sup>1</sup> <input type="checkbox"/> | <sup>2</sup> <input type="checkbox"/> | <sup>3</sup> <input type="checkbox"/> | <sup>4</sup> <input type="checkbox"/> |
| Totally unimportant                    | Very unimportant                       | Quite unimportant                      | Unimportant                            | Neither of both                       | Important                             | Quite important                       | Very important                        | Totally important                     |

**B286** Do you feel committed to use the filter?

- <sup>0</sup>  Not at all    <sup>1</sup>  A little    <sup>2</sup>  Medium    <sup>3</sup>  Much    <sup>4</sup>  Very much

**B287** How annoyed do you feel if you forget to fill the filter?

- <sup>0</sup>  Not at all    <sup>1</sup>  A little    <sup>2</sup>  Medium    <sup>3</sup>  Much    <sup>4</sup>  Very much

**B288** How often does it happen to you that you want to fill the filter but then you prefer to do something else?

- <sup>0</sup>  (Almost) always    <sup>1</sup>  Often    <sup>2</sup>  Sometimes    <sup>3</sup>  (Almost) never

**B289** What is it that you prefer to do in these moments?

\_\_\_\_\_

**B293** How strongly do you intend to always have water in the filter?

- <sup>0</sup>  Not at all    <sup>1</sup>  Not    <sup>2</sup>  A little    <sup>3</sup>  Strongly    <sup>4</sup>  Very strongly

**B294** I want to fill the filter with water regularly from now on.

| Rather disagree             |                             |                             | Rather neutral              |                              |                            | Rather agree               |                            |                            |
|-----------------------------|-----------------------------|-----------------------------|-----------------------------|------------------------------|----------------------------|----------------------------|----------------------------|----------------------------|
| -4 <input type="checkbox"/> | -3 <input type="checkbox"/> | -2 <input type="checkbox"/> | -1 <input type="checkbox"/> | 0 <input type="checkbox"/>   | 1 <input type="checkbox"/> | 2 <input type="checkbox"/> | 3 <input type="checkbox"/> | 4 <input type="checkbox"/> |
| I strongly disagree         | I disagree                  | I quite disagree            | I rather disagree           | I neither agree nor disagree | I rather agree             | I quite agree              | I agree                    | I strongly agree           |

| Various barriers make it hard to use the filter. How certain are you that you can use the filter? <b>Are you sure that...</b> |                                                                                                                                                                                                                                                  |
|-------------------------------------------------------------------------------------------------------------------------------|--------------------------------------------------------------------------------------------------------------------------------------------------------------------------------------------------------------------------------------------------|
| <b>B290</b> ...you can use the filter to prepare as much arsenic free water as you need within the next year?                 | 0 <input type="checkbox"/> Very unsure<br>1 <input type="checkbox"/> Unsure<br>2 <input type="checkbox"/> A little bit unsure<br>3 <input type="checkbox"/> Sure<br>4 <input type="checkbox"/> Very sure                                         |
| <b>B291</b> ...you can use the filter to prepare as much arsenic free water as you need within the next month?                | 0 <input type="checkbox"/> Very unsure<br>1 <input type="checkbox"/> Unsure<br>2 <input type="checkbox"/> A little bit unsure<br>3 <input type="checkbox"/> Sure<br>4 <input type="checkbox"/> Very sure                                         |
| <b>B292</b> ...you can use the filter to prepare as much arsenic free water as you need within the next week?                 | 0 <input type="checkbox"/> Very unsure<br>1 <input type="checkbox"/> Unsure<br>2 <input type="checkbox"/> A little bit unsure<br>3 <input type="checkbox"/> Sure<br>4 <input type="checkbox"/> Very sure                                         |
| <b>For people who haven't started using the filter:</b>                                                                       |                                                                                                                                                                                                                                                  |
| <b>If you intend to start filtering your water in the future, do you have a detailed plan...</b>                              |                                                                                                                                                                                                                                                  |
| <b>B295</b> ... <b>when</b> during the day to start using the filter?                                                         | 0 <input type="checkbox"/> No detailed plan at all<br>1 <input type="checkbox"/> No detailed plan<br>2 <input type="checkbox"/> Quite detailed plan<br>3 <input type="checkbox"/> Detailed plan<br>4 <input type="checkbox"/> Very detailed plan |
| <b>B296</b> ... <b>from when on</b> to start using the filter?                                                                | 0 <input type="checkbox"/> No detailed plan at all<br>1 <input type="checkbox"/> No detailed plan<br>2 <input type="checkbox"/> Quite detailed plan<br>3 <input type="checkbox"/> Detailed plan<br>4 <input type="checkbox"/> Very detailed plan |
| <b>B297</b> ... <b>how</b> to start using the filter?                                                                         | 0 <input type="checkbox"/> No detailed plan at all<br>1 <input type="checkbox"/> No detailed plan<br>2 <input type="checkbox"/> Quite detailed plan<br>3 <input type="checkbox"/> Detailed plan<br>4 <input type="checkbox"/> Very detailed plan |

| Have you thought about possible barriers that might interfere with your goal to continuously filter your water? Have you made a detailed plan regarding... |                                                                                                                                                                                                                                                  |
|------------------------------------------------------------------------------------------------------------------------------------------------------------|--------------------------------------------------------------------------------------------------------------------------------------------------------------------------------------------------------------------------------------------------|
| B298 ... what to do when the filter gets broken?                                                                                                           | 0 <input type="checkbox"/> No detailed plan at all<br>1 <input type="checkbox"/> No detailed plan<br>2 <input type="checkbox"/> Quite detailed plan<br>3 <input type="checkbox"/> Detailed plan<br>4 <input type="checkbox"/> Very detailed plan |
| B299 ... how to avoid forgetting to fill the filter?                                                                                                       | 0 <input type="checkbox"/> No detailed plan at all<br>1 <input type="checkbox"/> No detailed plan<br>2 <input type="checkbox"/> Quite detailed plan<br>3 <input type="checkbox"/> Detailed plan<br>4 <input type="checkbox"/> Very detailed plan |
| B300 ... what to do when the filter gets clogged?                                                                                                          | 0 <input type="checkbox"/> No detailed plan at all<br>1 <input type="checkbox"/> No detailed plan<br>2 <input type="checkbox"/> Quite detailed plan<br>3 <input type="checkbox"/> Detailed plan<br>4 <input type="checkbox"/> Very detailed plan |

B301 What do you do to ensure the filter works properly?

.....  
 .....

B302 Do you wash the filter media?      1  yes    0    no

B303 **If yes:** Every how many weeks do you wash the filter media?    Every.....weeks

| B304 Which parts of the filter have you ever repaired?<br><br>How much did you pay for the repairs? | Filter parts | Cost                |
|-----------------------------------------------------------------------------------------------------|--------------|---------------------|
|                                                                                                     |              | a                   |
|                                                                                                     | _1           | 888    I don't know |
|                                                                                                     | _2           | 888    I don't know |
|                                                                                                     | _3           | 888    I don't know |
| 9 <input type="checkbox"/> I have not repaired any parts yet                                        |              |                     |

B305 In your opinion, is repairing the filter expensive or cheap?

| Rather expensive            |                             |                             | Rather neutral              |                            |                            | Rather cheap               |                            |                            |
|-----------------------------|-----------------------------|-----------------------------|-----------------------------|----------------------------|----------------------------|----------------------------|----------------------------|----------------------------|
| -4 <input type="checkbox"/> | -3 <input type="checkbox"/> | -2 <input type="checkbox"/> | -1 <input type="checkbox"/> | 0 <input type="checkbox"/> | 1 <input type="checkbox"/> | 2 <input type="checkbox"/> | 3 <input type="checkbox"/> | 4 <input type="checkbox"/> |
| Very expensive              | Expensive                   | Quite expensive             | Rather expensive            | Neutral                    | Rather cheap               | Quite cheap                | Cheap                      | Very cheap                 |

B306 How many times was the filter broken in the last year and you couldn't use it? \_\_\_\_\_times

B307 How many times did you repair the filter in the last year? \_\_\_\_\_times

B308 How long were you not able to use the filter because it was broken? .....(days)

**B309** Why did it take a long time to make the repair(s)?

.....  
 .....

**B310** If you did not repair the filter: What are the reasons why you didn't repair the filter when it was broken?

.....  
 .....

**Filter Attitudes**

**B312** Do you think that using the filter is time-consuming?

|                            |                            |                            |                            |                            |
|----------------------------|----------------------------|----------------------------|----------------------------|----------------------------|
| 0 <input type="checkbox"/> | 1 <input type="checkbox"/> | 2 <input type="checkbox"/> | 3 <input type="checkbox"/> | 4 <input type="checkbox"/> |
| Not at all time-consuming  | Not time-consuming         | A little time-consuming    | Time-consuming             | Very time-consuming        |

**B313** Do you think that using the filter is effortful?

|                            |                            |                            |                            |                            |
|----------------------------|----------------------------|----------------------------|----------------------------|----------------------------|
| 0 <input type="checkbox"/> | 1 <input type="checkbox"/> | 2 <input type="checkbox"/> | 3 <input type="checkbox"/> | 4 <input type="checkbox"/> |
| Not at all effortful       | Not effortful              | A little effortful         | Effortful                  | Very effortful             |

**B314** How much do you like or dislike using the filter?

| Rather dislike it           |                             |                             | Rather neutral              |                                       |                            | Rather like it             |                            |                            |
|-----------------------------|-----------------------------|-----------------------------|-----------------------------|---------------------------------------|----------------------------|----------------------------|----------------------------|----------------------------|
| -4 <input type="checkbox"/> | -3 <input type="checkbox"/> | -2 <input type="checkbox"/> | -1 <input type="checkbox"/> | 0 <input type="checkbox"/>            | 1 <input type="checkbox"/> | 2 <input type="checkbox"/> | 3 <input type="checkbox"/> | 4 <input type="checkbox"/> |
| I dislike it very much      | I dislike it                | I quite dislike it          | I rather dislike it         | I neither dislike it nor do I like it | I rather like it           | I quite like it            | I like it                  | I like it very much        |

**B315** Considering all the benefits and efforts related to filtering the water, how much do you think is it worthwhile to filter your water?

| Rather more effort than benefit        |                                   |                                         | Rather neutral                             |                                               |                                                | Rather higher benefit than effort           |                                       |                                                 |
|----------------------------------------|-----------------------------------|-----------------------------------------|--------------------------------------------|-----------------------------------------------|------------------------------------------------|---------------------------------------------|---------------------------------------|-------------------------------------------------|
| -4 <input type="checkbox"/>            | -3 <input type="checkbox"/>       | -2 <input type="checkbox"/>             | -1 <input type="checkbox"/>                | 0 <input type="checkbox"/>                    | 1 <input type="checkbox"/>                     | 2 <input type="checkbox"/>                  | 3 <input type="checkbox"/>            | 4 <input type="checkbox"/>                      |
| It costs much more effort than benefit | It costs more effort than benefit | It costs quite more effort than benefit | It costs slightly more effort than benefit | The effort and the benefit are about the same | The benefit is slightly higher than the effort | The benefit is quite higher than the effort | The benefit is higher than the effort | The benefit is very much higher than the effort |

**B316** Does the filter remove all harmful substances (e.g. iron, arsenic)?

|                            |                             |                                    |                             |                            |                            |
|----------------------------|-----------------------------|------------------------------------|-----------------------------|----------------------------|----------------------------|
| 0 <input type="checkbox"/> | 1 <input type="checkbox"/>  | 2 <input type="checkbox"/>         | 3 <input type="checkbox"/>  | 4 <input type="checkbox"/> | 9 <input type="checkbox"/> |
| No substances are removed  | Some substances are removed | Quite a few substances are removed | Many substances are removed | All substances are removed | I don't know               |

**B317** How much do you like or dislike the appearance of the filter?

| Rather dislike it           |                             |                             | Rather neutral              |                                       |                            | Rather like it             |                            |                            |
|-----------------------------|-----------------------------|-----------------------------|-----------------------------|---------------------------------------|----------------------------|----------------------------|----------------------------|----------------------------|
| -4 <input type="checkbox"/> | -3 <input type="checkbox"/> | -2 <input type="checkbox"/> | -1 <input type="checkbox"/> | 0 <input type="checkbox"/>            | 1 <input type="checkbox"/> | 2 <input type="checkbox"/> | 3 <input type="checkbox"/> | 4 <input type="checkbox"/> |
| I dislike it very much      | I dislike it                | I quite dislike it          | I rather dislike it         | I neither dislike it nor do I like it | I rather like it           | I quite like it            | I like it                  | I like it very much        |

**B318** What exactly do you like/dislike about the appearance of the filter?

.....  
 .....

B319 Is there anything that makes it easier for you to use the filter?

.....  
 .....

B320 What do you think of people who use filters to prepare their drinking water?

| Rather badly                |                             |                             | Rather neutral               |                                        |                             | Rather well                |                            |                            |
|-----------------------------|-----------------------------|-----------------------------|------------------------------|----------------------------------------|-----------------------------|----------------------------|----------------------------|----------------------------|
| -4 <input type="checkbox"/> | -3 <input type="checkbox"/> | -2 <input type="checkbox"/> | -1 <input type="checkbox"/>  | 0 <input type="checkbox"/>             | 1 <input type="checkbox"/>  | 2 <input type="checkbox"/> | 3 <input type="checkbox"/> | 4 <input type="checkbox"/> |
| I think very badly of them  | I think badly of them       | I think quite badly of them | I think rather badly of them | I think neither badly nor well of them | I think rather well of them | I think quite well of them | I think well of them       | I think very well of them  |

B321 How often do you do what other members of your atio shojun (= relatives) except your household members do?

0  (Almost) never    1  Sometimes    2  Often    3  (Almost) always

B322 How often do you do what other people in your village do?

0  (Almost) never    1  Sometimes    2  Often    3  (Almost) always

B323 Let's suppose you drink filtered water. Would people who are important to you rather approve or disapprove of this?

| Rather disapprove           |                             |                               | Rather neutral              |                                        |                            | Rather approve             |                            |                            |
|-----------------------------|-----------------------------|-------------------------------|-----------------------------|----------------------------------------|----------------------------|----------------------------|----------------------------|----------------------------|
| -4 <input type="checkbox"/> | -3 <input type="checkbox"/> | -2 <input type="checkbox"/>   | -1 <input type="checkbox"/> | 0 <input type="checkbox"/>             | 1 <input type="checkbox"/> | 2 <input type="checkbox"/> | 3 <input type="checkbox"/> | 4 <input type="checkbox"/> |
| Nearly all disapprove       | Most disapprove             | Significantly more disapprove | Rather more disapprove      | The same amount disapprove and approve | Rather more approve        | Significantly more approve | Most approve               | Nearly all approve         |

B325 Are there specific persons that are important for you, who would disapprove the use of the filters?

1  yes    0 no

B326 If yes: Who? \_\_\_\_\_

B403 Are there specific persons that are important for you, who would approve of you using the filter?

1  yes    0 no

B404 If yes: Who? \_\_\_\_\_

B327 It is expected of me that I use the filter.

| Rather disagree             |                             |                             | Rather neutral              |                              |                            | Rather agree               |                            |                            |
|-----------------------------|-----------------------------|-----------------------------|-----------------------------|------------------------------|----------------------------|----------------------------|----------------------------|----------------------------|
| -4 <input type="checkbox"/> | -3 <input type="checkbox"/> | -2 <input type="checkbox"/> | -1 <input type="checkbox"/> | 0 <input type="checkbox"/>   | 1 <input type="checkbox"/> | 2 <input type="checkbox"/> | 3 <input type="checkbox"/> | 4 <input type="checkbox"/> |
| I strongly disagree         | I disagree                  | I quite disagree            | I rather disagree           | I neither agree nor disagree | I rather agree             | I quite agree              | I agree                    | I strongly agree           |

B328 To what extent do you see yourself as being capable of using the filter to prepare as much water as you need?

0  Not at all capable    1  Not capable    2  Quite capable    3  Capable    4  Very capable

B329 How difficult or easy is it to use the filter?

| Rather difficult            |                             |                             | Rather neutral              |                            |                            | Rather easy                |                            |                            |
|-----------------------------|-----------------------------|-----------------------------|-----------------------------|----------------------------|----------------------------|----------------------------|----------------------------|----------------------------|
| -4 <input type="checkbox"/> | -3 <input type="checkbox"/> | -2 <input type="checkbox"/> | -1 <input type="checkbox"/> | 0 <input type="checkbox"/> | 1 <input type="checkbox"/> | 2 <input type="checkbox"/> | 3 <input type="checkbox"/> | 4 <input type="checkbox"/> |
| Very difficult              | Difficult                   | Quite difficult             | Rather difficult            | Neither easy nor difficult | Rather easy                | Quite easy                 | Easy                       | Very easy                  |

## Attitudes drinking filtered water

B330 How much do you like or dislike drinking filtered water?

| Rather dislike it           |                             |                             | Rather neutral              |                                       |                            | Rather like it             |                            |                            |
|-----------------------------|-----------------------------|-----------------------------|-----------------------------|---------------------------------------|----------------------------|----------------------------|----------------------------|----------------------------|
| -4 <input type="checkbox"/> | -3 <input type="checkbox"/> | -2 <input type="checkbox"/> | -1 <input type="checkbox"/> | 0 <input type="checkbox"/>            | 1 <input type="checkbox"/> | 2 <input type="checkbox"/> | 3 <input type="checkbox"/> | 4 <input type="checkbox"/> |
| I dislike it very much      | I dislike it                | I quite dislike it          | I rather dislike it         | I neither dislike it nor do I like it | I rather like it           | I quite like it            | I like it                  | I like it very much        |

B331 How much do you like or dislike the **taste** of filtered water?

| Rather dislike it           |                             |                             | Rather neutral              |                                       |                            | Rather like it             |                            |                            |
|-----------------------------|-----------------------------|-----------------------------|-----------------------------|---------------------------------------|----------------------------|----------------------------|----------------------------|----------------------------|
| -4 <input type="checkbox"/> | -3 <input type="checkbox"/> | -2 <input type="checkbox"/> | -1 <input type="checkbox"/> | 0 <input type="checkbox"/>            | 1 <input type="checkbox"/> | 2 <input type="checkbox"/> | 3 <input type="checkbox"/> | 4 <input type="checkbox"/> |
| I dislike it very much      | I dislike it                | I quite dislike it          | I rather dislike it         | I neither dislike it nor do I like it | I rather like it           | I quite like it            | I like it                  | I like it very much        |

B332 How much do you like or dislike the **smell** of filtered water?

| Rather dislike it           |                             |                             | Rather neutral              |                                       |                            | Rather like it             |                            |                            |
|-----------------------------|-----------------------------|-----------------------------|-----------------------------|---------------------------------------|----------------------------|----------------------------|----------------------------|----------------------------|
| -4 <input type="checkbox"/> | -3 <input type="checkbox"/> | -2 <input type="checkbox"/> | -1 <input type="checkbox"/> | 0 <input type="checkbox"/>            | 1 <input type="checkbox"/> | 2 <input type="checkbox"/> | 3 <input type="checkbox"/> | 4 <input type="checkbox"/> |
| I dislike it very much      | I dislike it                | I quite dislike it          | I rather dislike it         | I neither dislike it nor do I like it | I rather like it           | I quite like it            | I like it                  | I like it very much        |

B333 How much do you like or dislike the **temperature** of filtered water?

| Rather dislike it           |                             |                             | Rather neutral              |                                       |                            | Rather like it             |                            |                            |
|-----------------------------|-----------------------------|-----------------------------|-----------------------------|---------------------------------------|----------------------------|----------------------------|----------------------------|----------------------------|
| -4 <input type="checkbox"/> | -3 <input type="checkbox"/> | -2 <input type="checkbox"/> | -1 <input type="checkbox"/> | 0 <input type="checkbox"/>            | 1 <input type="checkbox"/> | 2 <input type="checkbox"/> | 3 <input type="checkbox"/> | 4 <input type="checkbox"/> |
| I dislike it very much      | I dislike it                | I quite dislike it          | I rather dislike it         | I neither dislike it nor do I like it | I rather like it           | I quite like it            | I like it                  | I like it very much        |

B334 How much do you like or dislike the **color** of filtered water?

| Rather dislike it           |                             |                             | Rather neutral              |                                       |                            | Rather like it             |                            |                            |
|-----------------------------|-----------------------------|-----------------------------|-----------------------------|---------------------------------------|----------------------------|----------------------------|----------------------------|----------------------------|
| -4 <input type="checkbox"/> | -3 <input type="checkbox"/> | -2 <input type="checkbox"/> | -1 <input type="checkbox"/> | 0 <input type="checkbox"/>            | 1 <input type="checkbox"/> | 2 <input type="checkbox"/> | 3 <input type="checkbox"/> | 4 <input type="checkbox"/> |
| I dislike it very much      | I dislike it                | I quite dislike it          | I rather dislike it         | I neither dislike it nor do I like it | I rather like it           | I quite like it            | I like it                  | I like it very much        |

B335 How high or low are the chances that you develop an illness when drinking filtered water?

| Rather low                  |                             |                             | Rather average              |                            |                            | Rather high                |                            |                            |
|-----------------------------|-----------------------------|-----------------------------|-----------------------------|----------------------------|----------------------------|----------------------------|----------------------------|----------------------------|
| -4 <input type="checkbox"/> | -3 <input type="checkbox"/> | -2 <input type="checkbox"/> | -1 <input type="checkbox"/> | 0 <input type="checkbox"/> | 1 <input type="checkbox"/> | 2 <input type="checkbox"/> | 3 <input type="checkbox"/> | 4 <input type="checkbox"/> |
| Very low                    | Low                         | Quite low                   | Rather low                  | Average                    | Rather high                | Quite high                 | High                       | Very high                  |

B336 Why do you think that you are likely / unlikely (**select according to previous answer!**) to develop an illness when drinking filtered water?

.....

.....

B337 Do you have any reservations about drinking filtered water?    1  yes    0  no

B338 **If any reservations:** What are your reservations?

.....

.....

B339 How much do you see a need for drinking filtered water?

0  No need at all    1  A little need    2  Quite some need    3  Much need    4  Very much need

**B340** How many people of your atio shojun (= relatives), excluding people of your household, drink filtered water?

- <sup>0</sup> (Almost) nobody (0%)    
 <sup>1</sup> Some of them (25%)    
 <sup>2</sup> Half of them (50%)    
 <sup>3</sup> Most of them (75%)    
 <sup>4</sup> (Almost) all of them (100%)

**B341** How many people outside your family drink filtered water?

- <sup>0</sup> (Almost) nobody (0%)    
 <sup>1</sup> Some of them (25%)    
 <sup>2</sup> Half of them (50%)    
 <sup>3</sup> Most of them (75%)    
 <sup>4</sup> (Almost) all of them (100%)

**B342** Do you think that, over all, people who are important to you rather approve or disapprove that/if you drink filtered water?

| Rather disapprove                      |                                        |                                        | Rather neutral                         |                                        |                                       | Rather approve                        |                                       |                                       |
|----------------------------------------|----------------------------------------|----------------------------------------|----------------------------------------|----------------------------------------|---------------------------------------|---------------------------------------|---------------------------------------|---------------------------------------|
| <input type="checkbox"/> <sup>-4</sup> | <input type="checkbox"/> <sup>-3</sup> | <input type="checkbox"/> <sup>-2</sup> | <input type="checkbox"/> <sup>-1</sup> | <input type="checkbox"/> <sup>0</sup>  | <input type="checkbox"/> <sup>1</sup> | <input type="checkbox"/> <sup>2</sup> | <input type="checkbox"/> <sup>3</sup> | <input type="checkbox"/> <sup>4</sup> |
| Nearly all disapprove                  | Most disapprove                        | Significantly more disapprove          | Rather more disapprove                 | The same amount disapprove and approve | Rather more approve                   | Significantly more approve            | Most approve                          | Nearly all approve                    |

**B346** How important is it for you to drink filtered water regularly?

- <sup>0</sup> Not important at all    
 <sup>1</sup> Not very important    
 <sup>2</sup> Quite important    
 <sup>3</sup> Important    
 <sup>4</sup> Very important

**B347** How important is it for you to present filtered water to your guests?

- <sup>0</sup> Not important at all    
 <sup>1</sup> Not very important    
 <sup>2</sup> Quite important    
 <sup>3</sup> Important    
 <sup>4</sup> Very important

**B348** How proud or ashamed are you to offer filtered water to your guests?

| Rather ashamed                         |                                        |                                        | Rather neutral                         |                                       |                                       | Rather proud                          |                                       |                                       |
|----------------------------------------|----------------------------------------|----------------------------------------|----------------------------------------|---------------------------------------|---------------------------------------|---------------------------------------|---------------------------------------|---------------------------------------|
| <input type="checkbox"/> <sup>-4</sup> | <input type="checkbox"/> <sup>-3</sup> | <input type="checkbox"/> <sup>-2</sup> | <input type="checkbox"/> <sup>-1</sup> | <input type="checkbox"/> <sup>0</sup> | <input type="checkbox"/> <sup>1</sup> | <input type="checkbox"/> <sup>2</sup> | <input type="checkbox"/> <sup>3</sup> | <input type="checkbox"/> <sup>4</sup> |
| Very ashamed                           | Ashamed                                | Quite ashamed                          | Rather ashamed                         | Neither ashamed nor proud             | Rather proud                          | Quite proud                           | Proud                                 | Very proud                            |

**B349** What would your guests think of you if you did not have filtered water?

| Rather badly                           |                                        |                                        | Rather neutral                         |                                               |                                       | Rather well                           |                                       |                                       |
|----------------------------------------|----------------------------------------|----------------------------------------|----------------------------------------|-----------------------------------------------|---------------------------------------|---------------------------------------|---------------------------------------|---------------------------------------|
| <input type="checkbox"/> <sup>-4</sup> | <input type="checkbox"/> <sup>-3</sup> | <input type="checkbox"/> <sup>-2</sup> | <input type="checkbox"/> <sup>-1</sup> | <input type="checkbox"/> <sup>0</sup>         | <input type="checkbox"/> <sup>1</sup> | <input type="checkbox"/> <sup>2</sup> | <input type="checkbox"/> <sup>3</sup> | <input type="checkbox"/> <sup>4</sup> |
| They would think very badly of me      | They would think badly of me           | They would think quite badly of me     | They would think a little badly of me  | They would think neither well nor badly of me | They would think a little well of me  | They would think quite well of me     | They would think well of me           | They would think very well of me      |

**B350** How good or bad would you say is it to drink filtered water?

| Rather bad                             |                                        |                                        | Rather neutral                         |                                       |                                       | Rather good                           |                                       |                                       |
|----------------------------------------|----------------------------------------|----------------------------------------|----------------------------------------|---------------------------------------|---------------------------------------|---------------------------------------|---------------------------------------|---------------------------------------|
| <input type="checkbox"/> <sup>-4</sup> | <input type="checkbox"/> <sup>-3</sup> | <input type="checkbox"/> <sup>-2</sup> | <input type="checkbox"/> <sup>-1</sup> | <input type="checkbox"/> <sup>0</sup> | <input type="checkbox"/> <sup>1</sup> | <input type="checkbox"/> <sup>2</sup> | <input type="checkbox"/> <sup>3</sup> | <input type="checkbox"/> <sup>4</sup> |
| Very bad                               | Bad                                    | Quite bad                              | A little bit bad                       | Neither good nor bad                  | A little good                         | Quite good                            | Good                                  | Very good                             |

**B351** How certain are you that drinking only filtered water prevents you from getting arsenicosis?

- <sup>0</sup> Not at all certain    
 <sup>1</sup> Not very certain    
 <sup>2</sup> Quite certain    
 <sup>3</sup> Certain    
 <sup>4</sup> Very certain

**B352** How strongly do you intend to always drink filtered water?

- <sup>0</sup> Not at all    
 <sup>1</sup> Not    
 <sup>2</sup> A little    
 <sup>3</sup> Strongly    
 <sup>4</sup> Very strongly

B353 I want to drink filtered water regularly from now on.

| Rather disagree             |                             |                             | Rather neutral              |                              |                            | Rather agree               |                            |                            |
|-----------------------------|-----------------------------|-----------------------------|-----------------------------|------------------------------|----------------------------|----------------------------|----------------------------|----------------------------|
| -4 <input type="checkbox"/> | -3 <input type="checkbox"/> | -2 <input type="checkbox"/> | -1 <input type="checkbox"/> | 0 <input type="checkbox"/>   | 1 <input type="checkbox"/> | 2 <input type="checkbox"/> | 3 <input type="checkbox"/> | 4 <input type="checkbox"/> |
| I strongly disagree         | I disagree                  | I quite disagree            | I rather disagree           | I neither agree nor disagree | I rather agree             | I quite agree              | I agree                    | I strongly agree           |

### Willingness to pay

B354 What would be the maximum amount you would be willing to pay for a new filter? \_\_\_\_\_Tk

B355 Which price would you find reasonable to pay for a new filter? \_\_\_\_\_Tk

B356 Do you think 700 Taka for a new filter which cleans your drinking water is too cheap, too expensive or just about right?

| Rather cheap                |                             |                             | About right                 |                            |                            | Rather expensive           |                            |                            |
|-----------------------------|-----------------------------|-----------------------------|-----------------------------|----------------------------|----------------------------|----------------------------|----------------------------|----------------------------|
| -4 <input type="checkbox"/> | -3 <input type="checkbox"/> | -2 <input type="checkbox"/> | -1 <input type="checkbox"/> | 0 <input type="checkbox"/> | 1 <input type="checkbox"/> | 2 <input type="checkbox"/> | 3 <input type="checkbox"/> | 4 <input type="checkbox"/> |
| Much too cheap              | Cheap                       | Quite cheap                 | Rather cheap                | Just right                 | Rather expensive           | Quite expensive            | Expensive                  | Too expensive              |

B357 What would be the maximum amount you would be willing to pay for a refill of the filter media? \_\_\_\_\_Tk <sup>888</sup>  I don't know

B358 Which price would you find reasonable to pay for a refill of the filter media? \_\_\_\_\_Tk <sup>888</sup>  I don't know

B359 What do you think about the price of 700 Taka for a refill of the filter media?

<sup>0</sup>  Very low price    <sup>1</sup>  Low price    <sup>2</sup>  A modest price    <sup>3</sup>  High price    <sup>4</sup>  Very high price

B360 What would be the maximum amount you would be willing to pay for an arsenic test of your water source? \_\_\_\_\_Tk

B361 Which price would you find reasonable to pay for an arsenic test of your water source? \_\_\_\_\_Tk

B362 What do you think about the price of 100 Taka for an arsenic test of your water source?

<sup>0</sup>  Very low price    <sup>1</sup>  Low price    <sup>2</sup>  A modest price    <sup>3</sup>  High price    <sup>4</sup>  Very high price

B363 What would be the maximum amount you would be willing to pay per year for exchanging broken parts of the filter? \_\_\_\_\_Tk.

B364 And now, after all we discussed, would you now be willing to pay \_\_\_\_\_(insert max. amount from items above) for safe drinking water?

<sup>0</sup>  Certainly not    <sup>1</sup>  Probably not    <sup>2</sup>  Probably yes    <sup>3</sup>  Certainly yes

B367 Who of your household makes financial decisions?

<sup>0</sup>  male head of household    <sup>1</sup>  female head of household    <sup>2</sup>  other male    <sup>3</sup>  other female

B368 How much do you think NGOs should support you?

<sup>0</sup>  Not at all    <sup>1</sup>  A little    <sup>2</sup>  Medium    <sup>3</sup>  Much    <sup>4</sup>  Very much

B369 Who do you think is responsible for improving the water quality of your drinking water?

---

B370 Who do you think is responsible for changing the filter media?

---

B371 Who do you think is responsible for repairing the filter?

---

B372 What should be done in your opinion so that people who have a filter really use it?

.....

.....

.....

### Campaigns

B373 Were you ever visited by people from NGOs or the government who talked to you about water-related issues? Please tell me, when you were visited, who visited you, and what the visits were about (what the people told you, whether they installed anything or gave you any materials etc.).

|    | When did they visit?<br>(Date)<br><i>a</i> | Who visited?<br><i>b</i> | What was the visit about?<br><i>c</i> | What was installed / given?<br><i>d</i> |
|----|--------------------------------------------|--------------------------|---------------------------------------|-----------------------------------------|
| _1 |                                            |                          |                                       |                                         |
| _2 |                                            |                          |                                       |                                         |
| _3 |                                            |                          |                                       |                                         |
| _4 |                                            |                          |                                       |                                         |

B434 What kind of **community or group activities** regarding water-related issues were or have been going on in your area in the past 5 years (e.g. *focus group discussion, arsenic mitigation committee, etc.*)? Who initiated these activities? Please describe!

.....

.....

.....

## Health status and awareness

B374 How often do you talk positively about water treatment and health with others?

- 0 never
- 1 less often than every month
- 2 every month
- 3 every 3 weeks
- 4 every 2 weeks
- 5 every week
- 6 every 1 to 3 days

B375 Can you tell me what arsenic is?

---



---

B376 What are the effects of arsenic on your body?

---



---

B377 What do you think causes these effects of arsenic?

---



---

B378 How long does it take until arsenic has negative effects on the body?

---



---

B379 What can be done to avoid arsenic and its harmful effects?

---



---

**Explain to the respondent about arsenic, its health-effects and how it can be avoided!**

B380 What do you think of people who have arsenicosis?

| Rather badly                |                             |                             | Rather neutral               |                                        |                             | Rather well                |                            |                            |
|-----------------------------|-----------------------------|-----------------------------|------------------------------|----------------------------------------|-----------------------------|----------------------------|----------------------------|----------------------------|
| -4 <input type="checkbox"/> | -3 <input type="checkbox"/> | -2 <input type="checkbox"/> | -1 <input type="checkbox"/>  | 0 <input type="checkbox"/>             | 1 <input type="checkbox"/>  | 2 <input type="checkbox"/> | 3 <input type="checkbox"/> | 4 <input type="checkbox"/> |
| I think very badly of them  | I think badly of them       | I think quite badly of them | I think rather badly of them | I think neither badly nor well of them | I think rather well of them | I think quite well of them | I think well of them       | I think very well of them  |

B381 Do you have arsenicosis?      1  yes      0  no      9  I don't know

B382 How many people of your household have arsenicosis?      \_\_\_\_\_ people      888  I don't know

B383 How many people outside your family have arsenicosis?      \_\_\_\_\_ people      888  I don't know

| Disadvantages of arsenicosis                                                                                                                                                               |                            |
|--------------------------------------------------------------------------------------------------------------------------------------------------------------------------------------------|----------------------------|
| 1. In your opinion what are the disadvantages of having arsenicosis?<br>2. Which one is the most important (=1), the 2nd most important (=2) and the 3rd most important disadvantage (=3)? | <b>Ranking</b><br><i>r</i> |
| B384                                                                                                                                                                                       |                            |
| B385                                                                                                                                                                                       |                            |
| B386                                                                                                                                                                                       |                            |
| B387                                                                                                                                                                                       |                            |

Imagine that you contracted arsenicosis, how severe would be the impact on...

B388 ... your life in general?

<sup>0</sup>  Not severe at all    <sup>1</sup>  Not severe    <sup>2</sup>  Quite severe    <sup>3</sup>  Severe    <sup>4</sup>  Very severe

B389 ... your social life?

<sup>0</sup>  Not severe at all    <sup>1</sup>  Not severe    <sup>2</sup>  Quite severe    <sup>3</sup>  Severe    <sup>4</sup>  Very severe

B390 ... your economic situation?

<sup>0</sup>  Not severe at all    <sup>1</sup>  Not severe    <sup>2</sup>  Quite severe    <sup>3</sup>  Severe    <sup>4</sup>  Very severe

B392 How high or low do you feel are the chances that you get arsenicosis?

| Rather low                             |                                        |                                        | Rather average                         |                                       |                                       | Rather high                           |                                       |                                       |
|----------------------------------------|----------------------------------------|----------------------------------------|----------------------------------------|---------------------------------------|---------------------------------------|---------------------------------------|---------------------------------------|---------------------------------------|
| <sup>-4</sup> <input type="checkbox"/> | <sup>-3</sup> <input type="checkbox"/> | <sup>-2</sup> <input type="checkbox"/> | <sup>-1</sup> <input type="checkbox"/> | <sup>0</sup> <input type="checkbox"/> | <sup>1</sup> <input type="checkbox"/> | <sup>2</sup> <input type="checkbox"/> | <sup>3</sup> <input type="checkbox"/> | <sup>4</sup> <input type="checkbox"/> |
| Very low                               | Low                                    | Quite low                              | Rather low                             | Average                               | Rather high                           | Quite high                            | High                                  | Very high                             |

B365 Why do you think that the chances that you develop arsenicosis are high/low?

.....  
 .....

B393 How high or low are the chances that someone of your family develops arsenicosis?

| Rather low                             |                                        |                                        | Rather average                         |                                       |                                       | Rather high                           |                                       |                                       |
|----------------------------------------|----------------------------------------|----------------------------------------|----------------------------------------|---------------------------------------|---------------------------------------|---------------------------------------|---------------------------------------|---------------------------------------|
| <sup>-4</sup> <input type="checkbox"/> | <sup>-3</sup> <input type="checkbox"/> | <sup>-2</sup> <input type="checkbox"/> | <sup>-1</sup> <input type="checkbox"/> | <sup>0</sup> <input type="checkbox"/> | <sup>1</sup> <input type="checkbox"/> | <sup>2</sup> <input type="checkbox"/> | <sup>3</sup> <input type="checkbox"/> | <sup>4</sup> <input type="checkbox"/> |
| Very low                               | Low                                    | Quite low                              | Rather low                             | Average                               | Rather high                           | Quite high                            | High                                  | Very high                             |

B394 If you could avoid having arsenicosis, how much would you be willing to pay for it? \_\_\_\_\_ Tk

B395 If you could avoid having arsenicosis, how much effort would you be willing to give?

<sup>0</sup>  No effort    <sup>1</sup>  A little effort    <sup>2</sup>  Medium effort    <sup>3</sup>  Much effort    <sup>4</sup>  Very much effort

## Preferences of mitigation options

a. Which water options do you know that provide arsenic-free drinking water? ***Don't read this list!***

b. Which are your most, 2nd most and 3rd most preferred arsenic-free water options? **1 = the most preferred, 2 = 2nd most preferred, 3 = 3rd most preferred, 0 = option was not mentioned**

c. What are the advantages of these options?

r. Which advantages are most, 2nd most and 3rd most important for you? **1 = most important, 2 = 2nd most important, 3 = 3rd most important**

d. What are the disadvantages of these options?

r. Which disadvantages are most, 2nd most and 3rd most important for you? **1 = most important, 2 = 2nd most important, 3 = 3rd most important**

| Water option mentioned?                                                                                                             | Pref. ranking<br><i>b</i> | Advantages<br><i>c</i>                   | Import. ranking<br><i>r</i>      | Disadvantages<br><i>d</i>                | Import. ranking<br><i>r</i>      |
|-------------------------------------------------------------------------------------------------------------------------------------|---------------------------|------------------------------------------|----------------------------------|------------------------------------------|----------------------------------|
| B181 Household arsenic removal filter <sup>1</sup> <input type="checkbox"/> yes <sup>0</sup> <input type="checkbox"/> no            |                           | 1 _____<br>2 _____<br>3 _____<br>4 _____ | _____<br>_____<br>_____<br>_____ | 1 _____<br>2 _____<br>3 _____<br>4 _____ | _____<br>_____<br>_____<br>_____ |
| B182 Community arsenic removal filter (Sidko) <sup>1</sup> <input type="checkbox"/> yes <sup>0</sup> <input type="checkbox"/> no    |                           | 1 _____<br>2 _____<br>3 _____<br>4 _____ | _____<br>_____<br>_____<br>_____ | 1 _____<br>2 _____<br>3 _____<br>4 _____ | _____<br>_____<br>_____<br>_____ |
| B183 Green/uncontaminated tubewell from neighbor <sup>1</sup> <input type="checkbox"/> yes <sup>0</sup> <input type="checkbox"/> no |                           | 1 _____<br>2 _____<br>3 _____<br>4 _____ | _____<br>_____<br>_____<br>_____ | 1 _____<br>2 _____<br>3 _____<br>4 _____ | _____<br>_____<br>_____<br>_____ |

| Water option mentioned?<br><br><i>1</i> <input type="checkbox"/> yes <i>0</i> <input type="checkbox"/> no | Pref. ranking<br><i>b</i> | Advantages<br><i>c</i>                   | Disadvantages<br><i>d</i>                | <i>Import. ranking</i><br><i>r</i> | <i>Import. ranking</i><br><i>r</i> |
|-----------------------------------------------------------------------------------------------------------|---------------------------|------------------------------------------|------------------------------------------|------------------------------------|------------------------------------|
| B184 Bottled water                                                                                        |                           | 1 _____<br>2 _____<br>3 _____<br>4 _____ | 1 _____<br>2 _____<br>3 _____<br>4 _____ |                                    |                                    |
| B185 Pond Sand Filter                                                                                     |                           | 1 _____<br>2 _____<br>3 _____<br>4 _____ | 1 _____<br>2 _____<br>3 _____<br>4 _____ |                                    |                                    |
| B186 Household rainwater harvesting system                                                                |                           | 1 _____<br>2 _____<br>3 _____<br>4 _____ | 1 _____<br>2 _____<br>3 _____<br>4 _____ |                                    |                                    |
| B187 Deep tubewell                                                                                        |                           | 1 _____<br>2 _____<br>3 _____<br>4 _____ | 1 _____<br>2 _____<br>3 _____<br>4 _____ |                                    |                                    |

| Water option mentioned?<br><br><i>1</i> <input type="checkbox"/> yes <i>0</i> <input type="checkbox"/> no | Pref. ranking<br><i>b</i> | Advantages<br><i>c</i>                   | Disadvantages<br><i>d</i>                | <i>Import. ranking</i><br><i>_r</i> | <i>Import. ranking</i><br><i>_r</i> |
|-----------------------------------------------------------------------------------------------------------|---------------------------|------------------------------------------|------------------------------------------|-------------------------------------|-------------------------------------|
| B188 Dugwell                                                                                              |                           | 1 _____<br>2 _____<br>3 _____<br>4 _____ | 1 _____<br>2 _____<br>3 _____<br>4 _____ |                                     |                                     |
| B189 Piped water supply                                                                                   |                           | 1 _____<br>2 _____<br>3 _____<br>4 _____ | 1 _____<br>2 _____<br>3 _____<br>4 _____ |                                     |                                     |
| B190 Re-sunk, arsenic-free tubewell                                                                       |                           | 1 _____<br>2 _____<br>3 _____<br>4 _____ | 1 _____<br>2 _____<br>3 _____<br>4 _____ |                                     |                                     |
| B191 Other: _____                                                                                         |                           | 1 _____<br>2 _____<br>3 _____<br>4 _____ | 1 _____<br>2 _____<br>3 _____<br>4 _____ |                                     |                                     |

## Data of the household

B121 Coordinates: **Mark waypoint on GPS!**

B122 Address (or description): .....

.....

B123 Number of persons living in the household (incl. children) (TOTAL): .....

B124 How many rooms does your household have? .....

B125 Monthly expenditure:..... Tk <sup>9</sup>  I don't know

B126 Monthly income: .....Tk <sup>9</sup>  I don't know

How many of the following commodities do you or any member of your household own?

B127..... House: .....

B128..... Bicycle: .....

B129..... Television (B/W): .....

B130..... Television (color): .....

B131..... Refrigerator:.....

B132..... Motorcycle:.....

B133..... Sewing machine: .....

B134..... Mobile phone:.....

B135..... Wardrobe:.....

B136..... Tables:.....

B137..... Chairs: .....

B138..... Watches/clocks: .....

B139..... Beds: .....

B140..... Sleeping cots:.....

B141 Do you have electricity? <sup>1</sup>  yes <sup>0</sup>  no

B142 Type of house floor (main): <sup>1</sup>  Earthen <sup>2</sup>  Bamboo  
<sup>3</sup>  Wood <sup>4</sup>  Cement  
<sup>5</sup>  Bricks <sup>6</sup>  Other:.....

B143 Type of house wall: <sup>1</sup>  Jute sticks/cane/bamboo <sup>2</sup>  Earth  
<sup>3</sup>  Wood <sup>4</sup>  Tin  
<sup>5</sup>  Brick/cement/block/concrete <sup>6</sup>  Other:.....

B144 Type of house ceiling: <sup>1</sup>  Jute sticks/bamboo/polyethylene <sup>2</sup>  Tin  
<sup>3</sup>  Cement/brick <sup>4</sup>  Other:.....

B145 What fuel do you cook with? <sup>1</sup>  Wood <sup>2</sup>  Crop residue/grass/dung <sup>3</sup>  Liquid gas/gas

B146 How much land does your household own (incl. homestead land): .....decimals

## Comments & recommendations

B396 Do you have any comments for us?

.....

.....

.....

B265 **Observation:** Is the filter filled?

<sup>2</sup> yes, it was filled a while ago <sup>1</sup> it was filled just now <sup>0</sup> no, filter is dry

B311 Is the filter operational? Any broken parts? (observed)

- <sup>0</sup>  No, the filter is totally broken and out of order
- <sup>1</sup>  Yes, the filter is working but some parts are broken
- <sup>2</sup>  Yes, the filter is working, nothing is broken

B398 Number of people present during interview: ..... End time: .....

|                                              |                 |                                                   |                 |
|----------------------------------------------|-----------------|---------------------------------------------------|-----------------|
| <i>Official use:</i>                         |                 |                                                   |                 |
| <b>Checked:</b> <input type="checkbox"/> yes | Initials: ..... | <b>Data entered:</b> <input type="checkbox"/> yes | Initials: ..... |
